# Supplementary material for: Lentiviral Hematopoietic Stem Cell Gene Therapy Corrects Murine Pompe Disease
Source: PubMed Central journal article supplement — Mol Ther Methods Clin Dev. 2020 May 4;17:1014–25. doi: 10.1016/j.omtm.2020.04.023 (PMC7240064; doi:10.1016/j.omtm.2020.04.023), 2020-05-04
Supplement: mmc1.pdf [file mmc1.pdf]

**OMTM, Volume 17**

## **Supplemental Information**

### **Lentiviral Hematopoietic Stem Cell Gene**

### **Therapy Corrects Murine Pompe Disease**

**Merel Stok, Helen de Boer, Marshall W. Huston, Edwin H. Jacobs, Onno Roovers, Trudi P. Visser, Holger Jahr, Dirk J. Duncker, Elza D. van Deel, Arnold J.J. Reuser, Niek P. van Til, and Gerard Wagemaker**

**S1 Fig. Circadian rhythm is maintained in voluntary running wheel exercises.**

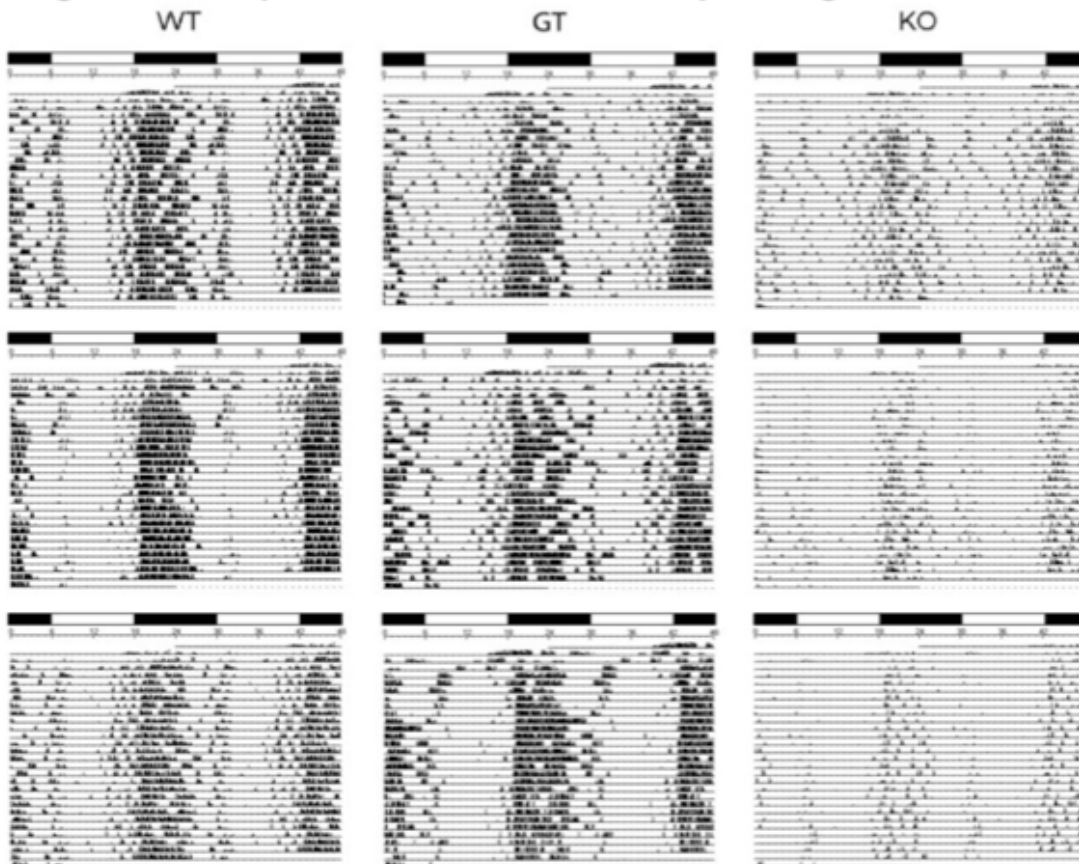

The actograms represent circadian locomotor activity and rest cycles. The interrupted horizontal bar above the actograms displays day (white) and night (black) cycles. A 48-hour time frame is shown depicting running periods (in black) and resting periods out of the running wheels. Three representative mice are displayed for each condition, i.e. wild-type (WT), *GAAco* treated *Gaa*<sup>-/-</sup> mice (GT) and *Gaa*<sup>-/-</sup> mice (KO). All animals became more active during the night and all groups showed similar day/night activity patterns, except that KO mice were considerably less active.

S2 Fig. GAA in microglia (upper panel, magnification x 100) and astrocytes (magnification x 10).

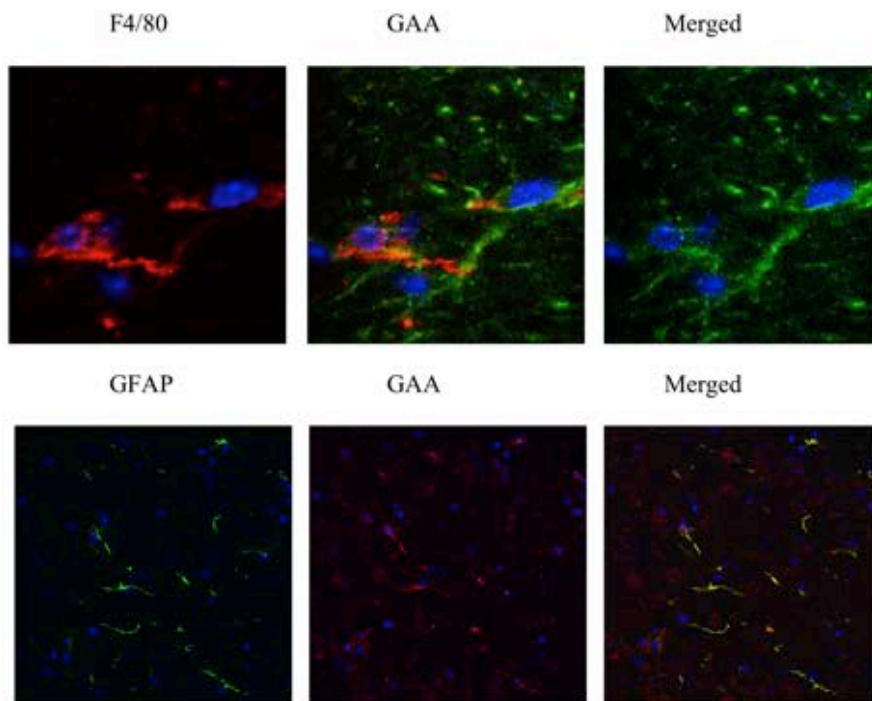

Representative areas of microglia with in green the GAA staining and in red the F4/80 staining, whereas blue represents the Hoechst staining. In the astrocytes, red represents GAA staining and green the astrocytes GFAP staining, showing that virtually all astrocytes stain positive for GAA.

**S1 Table. Common integration sites**

| Vector           | Num. of samples | Total IS | Unique Genes  | IS within 10kb of TSS | IS within 10kb of gene | Intronic IS                    |
|------------------|-----------------|----------|---------------|-----------------------|------------------------|--------------------------------|
| GAAco            | 36              | 333      | 310           | 65                    | 221                    | 180                            |
| GFP              | 5               | 424      | 388           | 91                    | 304                    | 249                            |
| Continuation:    |                 |          |               |                       |                        |                                |
| Unique Oncogenes | Total oncogenes | CIS      | CIS oncogenes | Frequency oncogenes   | Frequency intronic IS  | Frequency IS w/in 10kb of gene |
| 12               | 14              | 15       | 2             | 4.2%                  | 54.1%                  | 66.4%                          |
| 12               | 13              | 25       | 1             | 3.1%                  | 58.7%                  | 71.7%                          |

**S2 Table. List of all CIS, oncogenes in red**

| vector       | CISorder | Chromosome | Gene           | Loci                       |
|--------------|----------|------------|----------------|----------------------------|
| <b>GAAco</b> | <b>2</b> | <b>1</b>   | <b>Cr2</b>     | <b>197025311;197025462</b> |
| <b>GAAco</b> | <b>2</b> | <b>8</b>   | <b>Eps15l1</b> | <b>74919901;74919904</b>   |
| GAAco        | 2        | X          | Cybb           | 9041400;9041771            |
| GAAco        | 2        | 1          | Smap1          | 23885060;23885061          |
| GAAco        | 2        | 1          | 37500          | 95387308;95387315          |
| GAAco        | 2        | 1          | Mcm6           | 130277570;130277585        |
| GAAco        | 2        | 1          | Scama3a        | 161234959;161234977        |
| GAAco        | 2        | 1          | Gm4846         | 168411650;168411781        |
| GAAco        | 2        | 1          | Cr1l           | 196946840;196946841        |
| GAAco        | 2        | 9          | Trpc6          | 8581308;8581617            |
| GAAco        | 2        | 9          | Elovl5         | 77797454;77797462          |
| GAAco        | 2        | 10         | Mir1929        | 44061578;44061740          |
| GAAco        | 2        | 10         | Ascc3          | 50315191;50315792          |
| GAAco        | 2        | 16         | Mir28          | 24902398;24902457          |
| GAAco        | 2        | 18         | Tmx3           | 90693725;90712409          |
| <b>GFP</b>   | <b>2</b> | <b>18</b>  | <b>Zfp521</b>  | <b>13872964;13873209</b>   |
| GFP          | 2        | 2          | Plxdc2         | 16282665;16282854          |
| GFP          | 2        | 3          | Gyg            | 20021989;20022410          |
| GFP          | 2        | 3          | Hist2h2aa2     | 96047653;96048217          |
| GFP          | 2        | 3          | Sfrs11         | 157683042;157707831        |
| GFP          | 2        | 5          | Pcdh7          | 58178866;58187690          |
| GFP          | 2        | 5          | Cenpc1         | 86387408;86387768          |
| GFP          | 2        | 5          | AU042671       | 121751014;121751172        |
| GFP          | 2        | 6          | Cul1           | 47445391;47464266          |
| GFP          | 2        | 6          | Bicd1          | 149497766;149508208        |
| GFP          | 2        | 8          | Large          | 75821352;75821490          |
| GFP          | 2        | 9          | Slc37a2        | 37102871;37103208          |
| GFP          | 2        | 10         | Jmjd1c         | 66660521;66689907          |
| GFP          | 2        | 11         | Sfi1           | 3086225;3095580            |
| GFP          | 2        | 11         | Sifn1          | 82909894;82925619          |
| GFP          | 2        | 11         | H3f3b          | 115887991;115888197        |
| GFP          | 2        | 12         | Stxbp6         | 46220785;46221361          |
| GFP          | 2        | 13         | Hrh2           | 54307859;54308041          |
| GFP          | 2        | 13         | Edil3          | 89376126;89376754          |
| GFP          | 2        | 15         | Abra           | 41616255;41616522          |
| GFP          | 2        | 15         | Taf2           | 54871080;54871277          |
| GFP          | 2        | 15         | Phf20l1        | 66402373;66402700          |
| GFP          | 2        | 16         | Cggbp1         | 64821368;64821516          |
| GFP          | 2        | 16         | Gbe1           | 70413892;70418655          |
| GFP          | 2        | 18         | Wac            | 7873989;7901856            |
